# Supplementary figures and images for: The Relationship between Fluid Flow, Structures, and Depositional Architecture in Sedimentary Rocks: An Example-Based Overview
Source: Hindawi journal article supplement (doi:10.1155/2020/3506743), 2020-07-14

Example 1, Ras ir Raheb, Malta

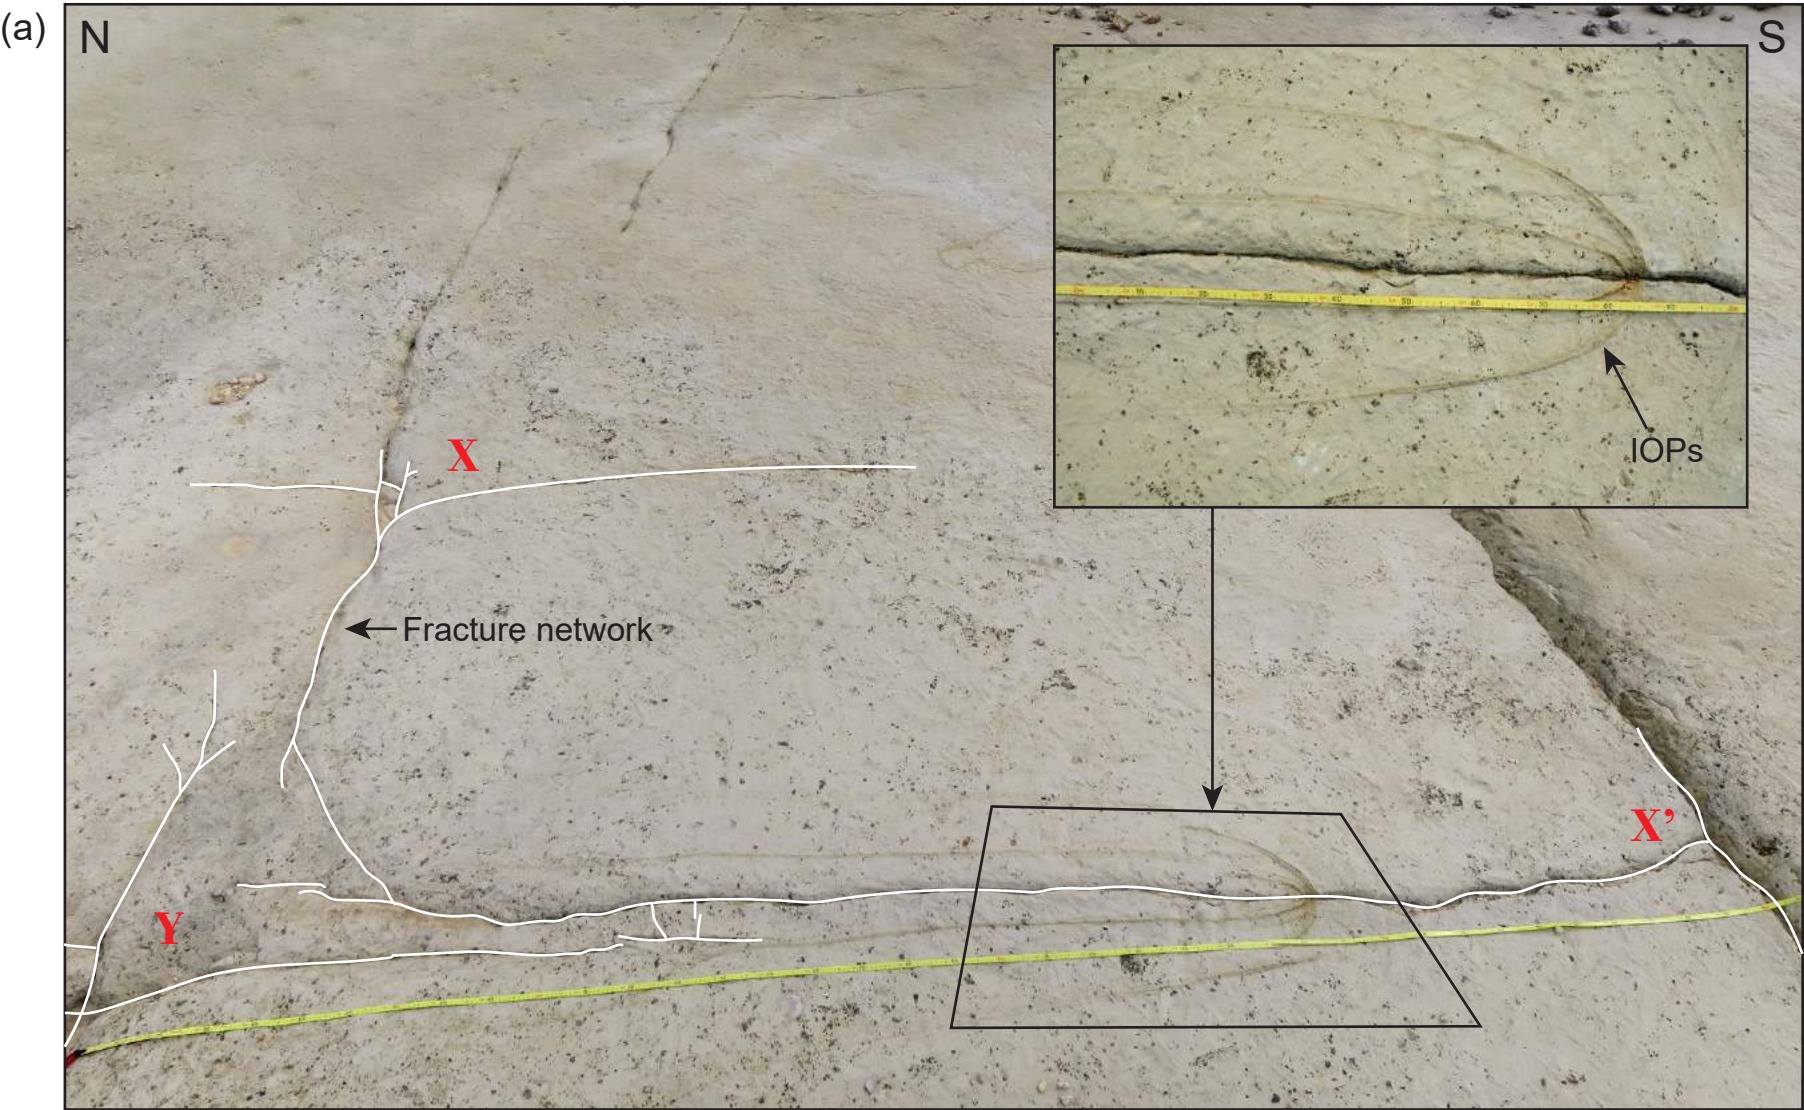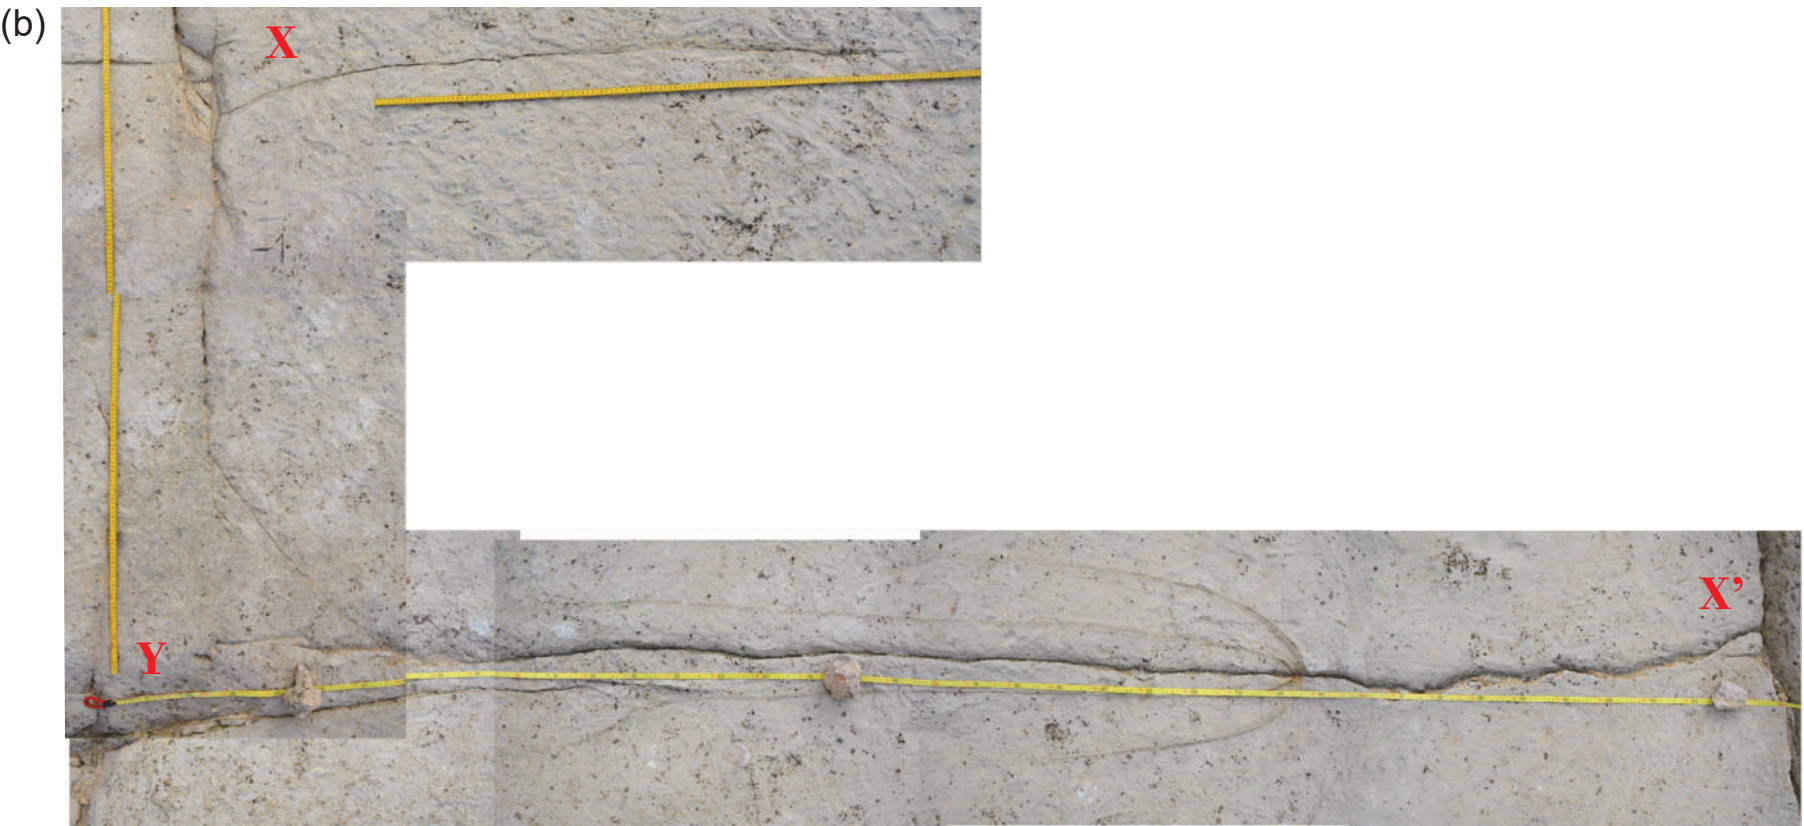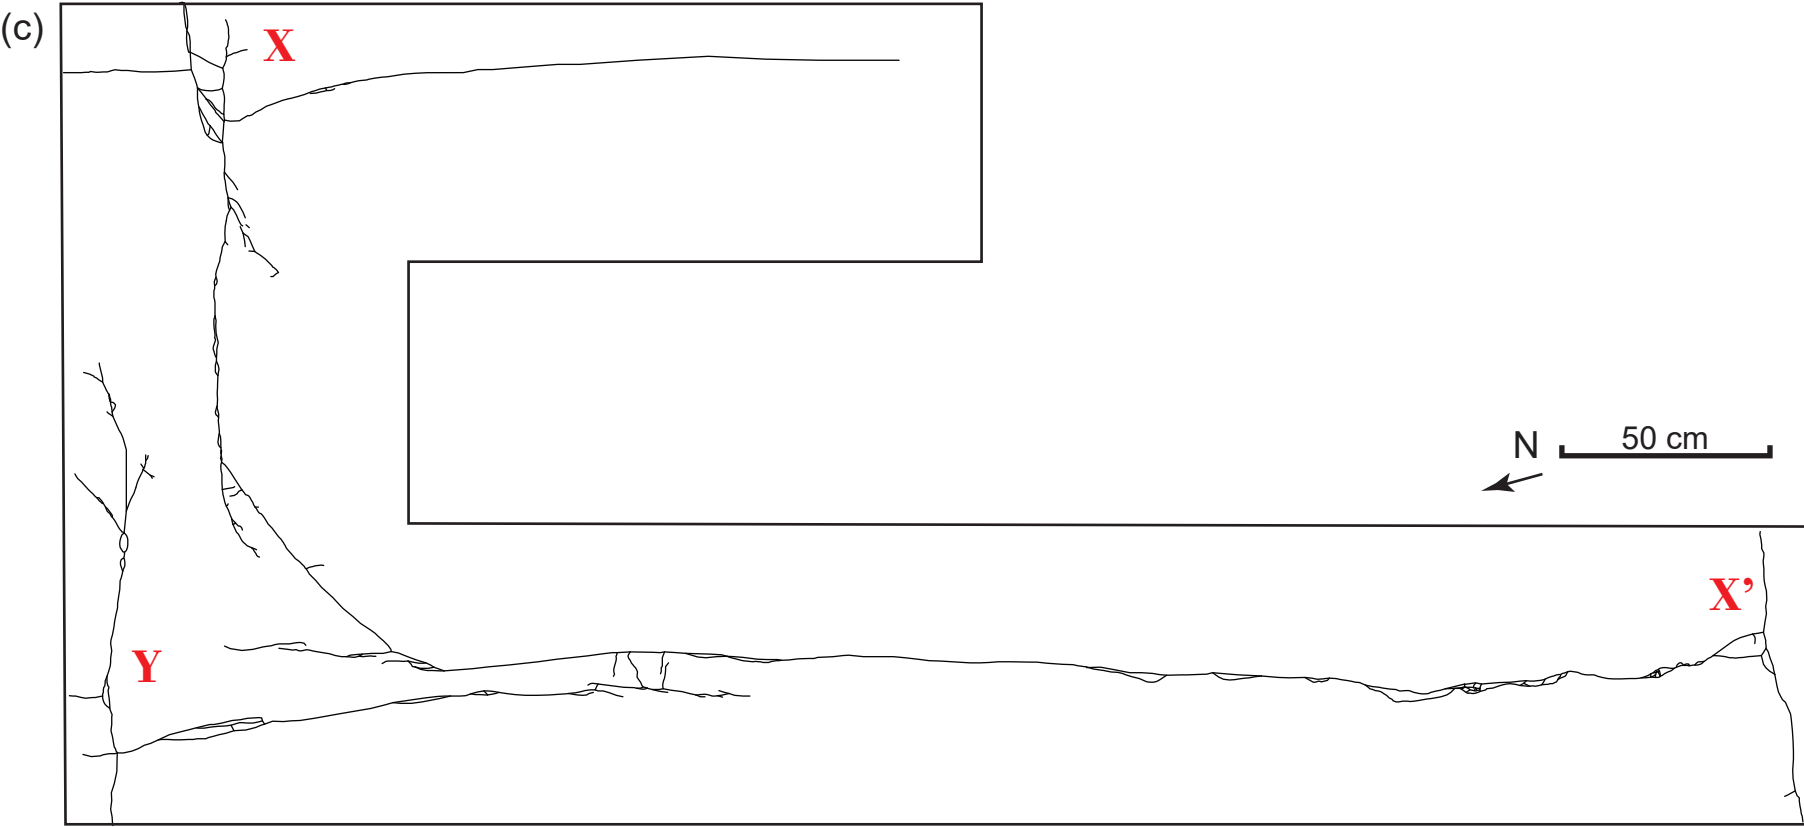



Example 2, Ras ir Raheb, Malta

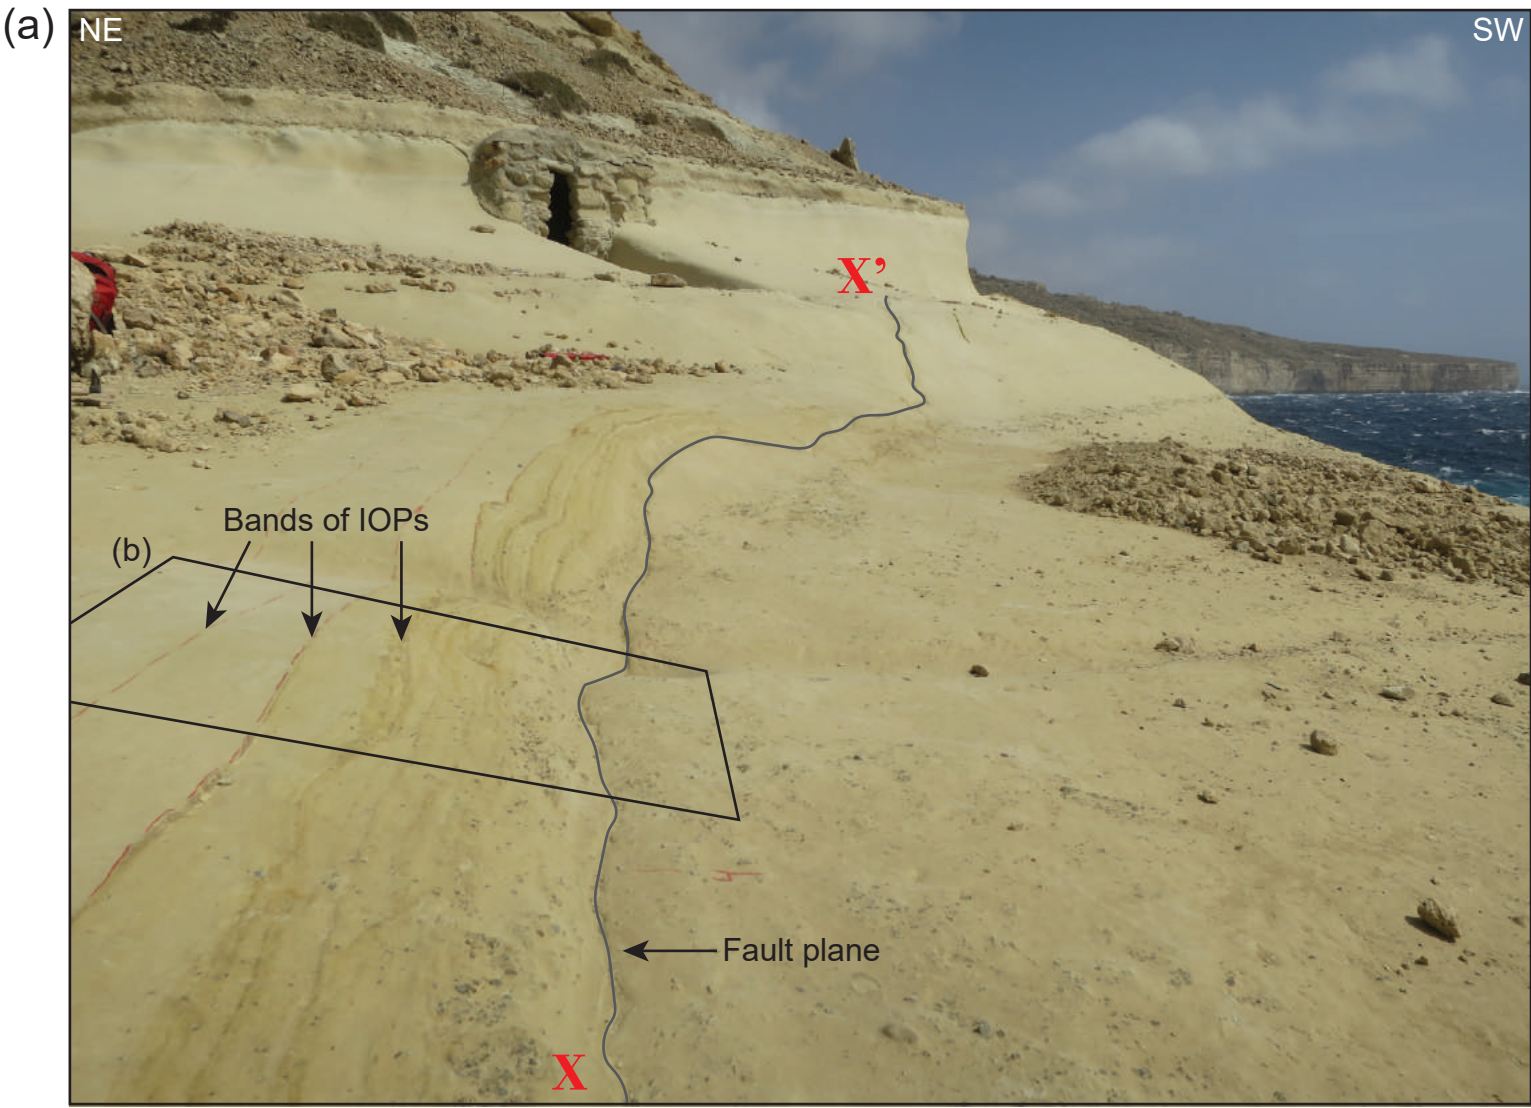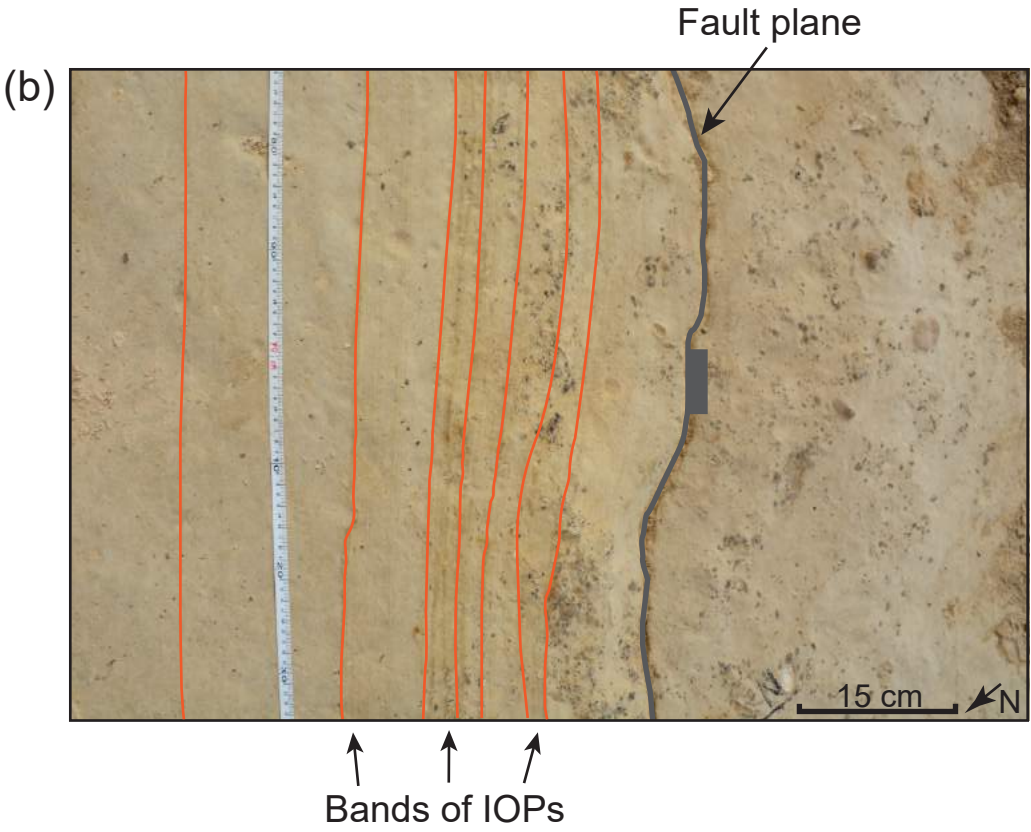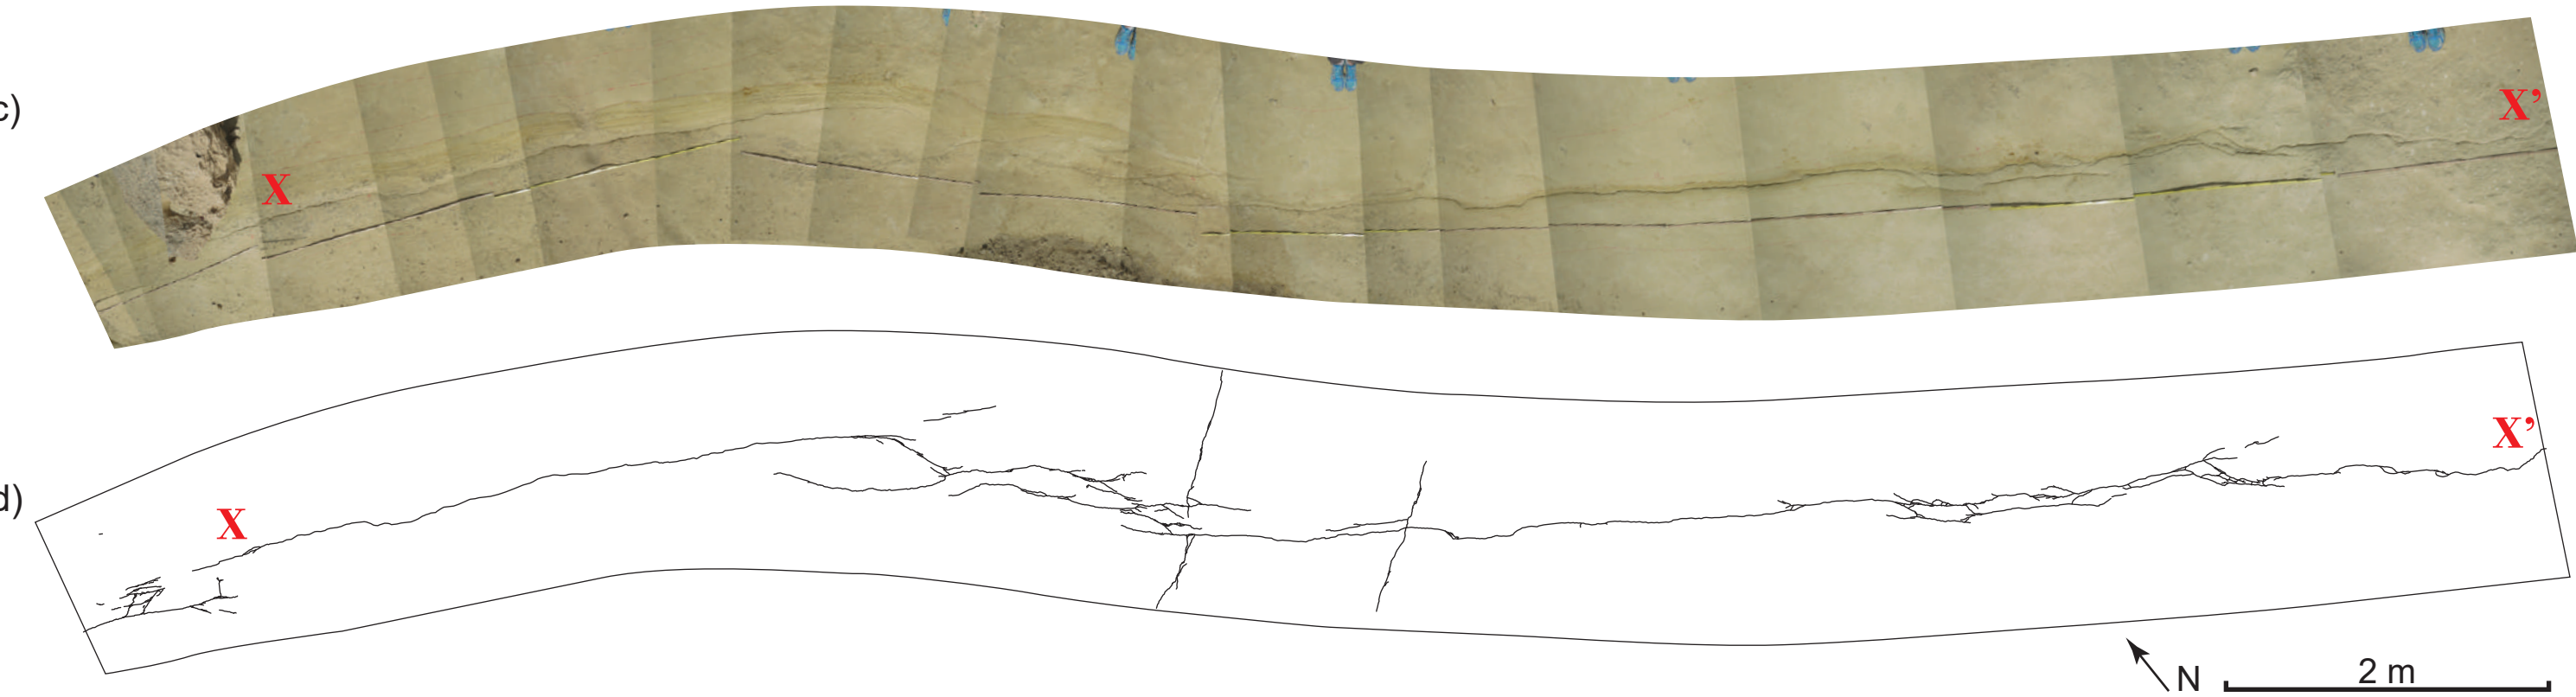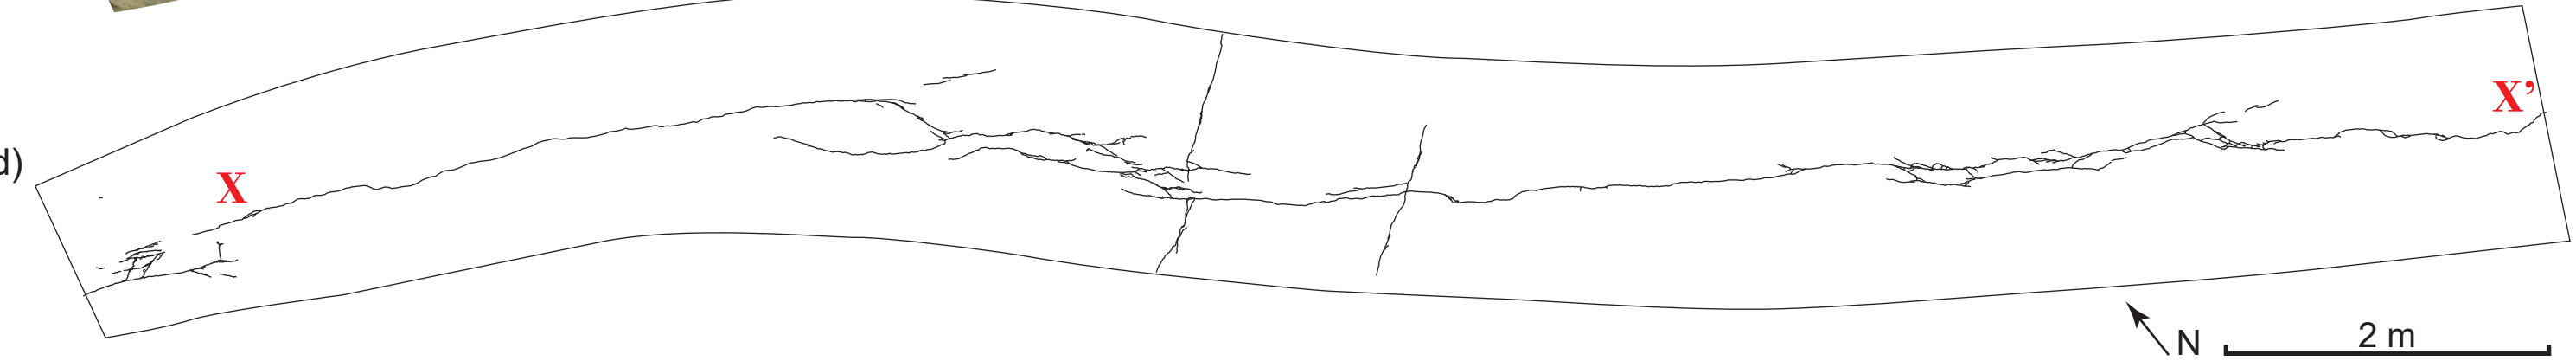



Example 3, Marsalforn, Gozo

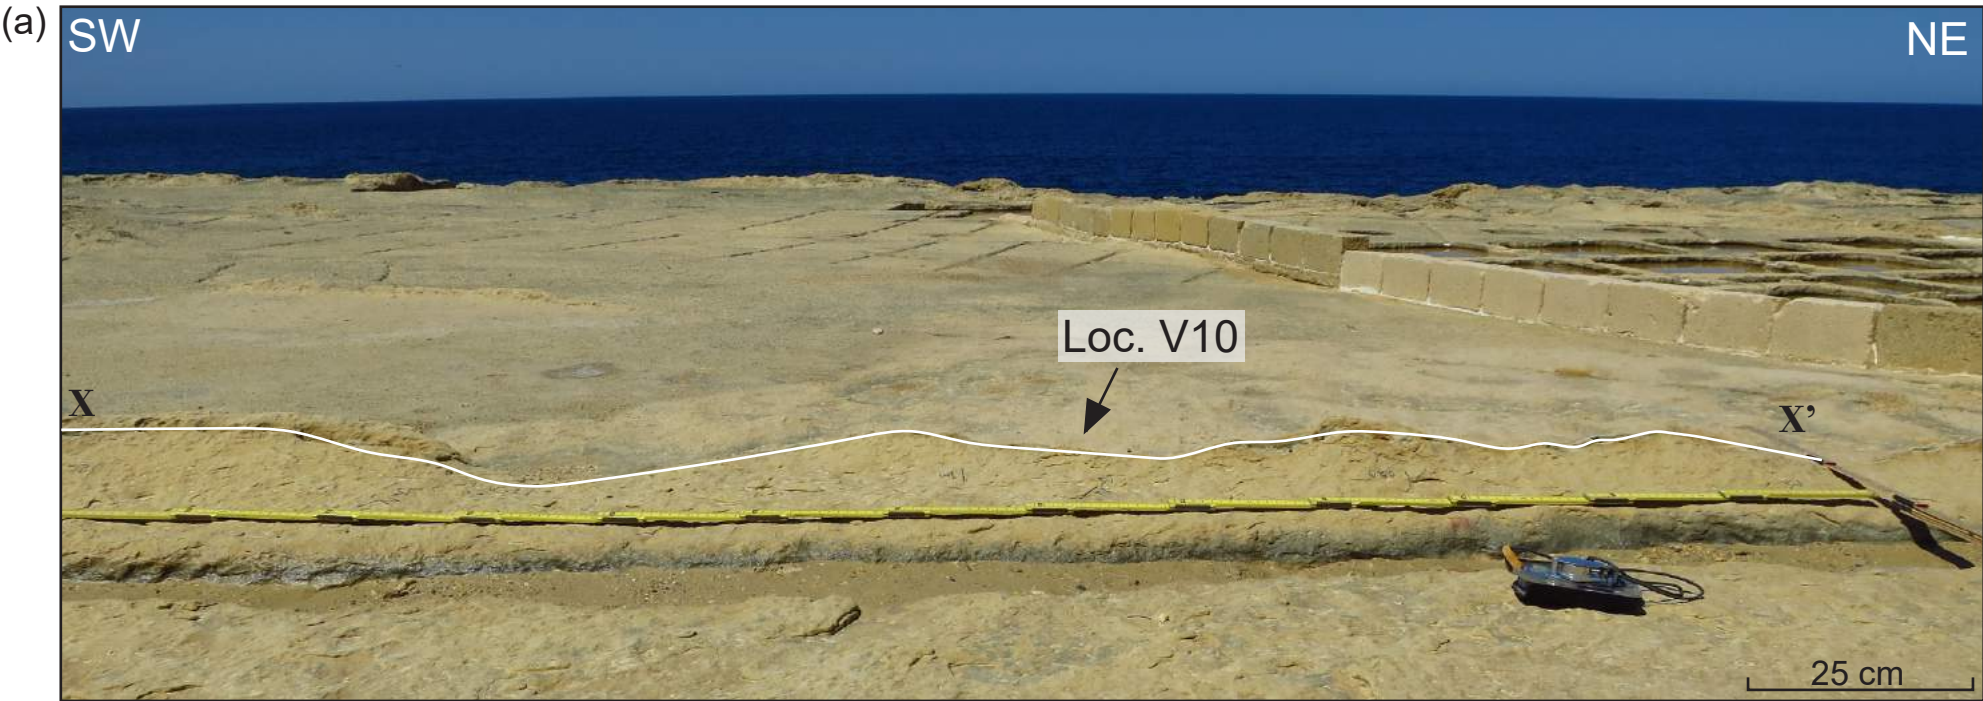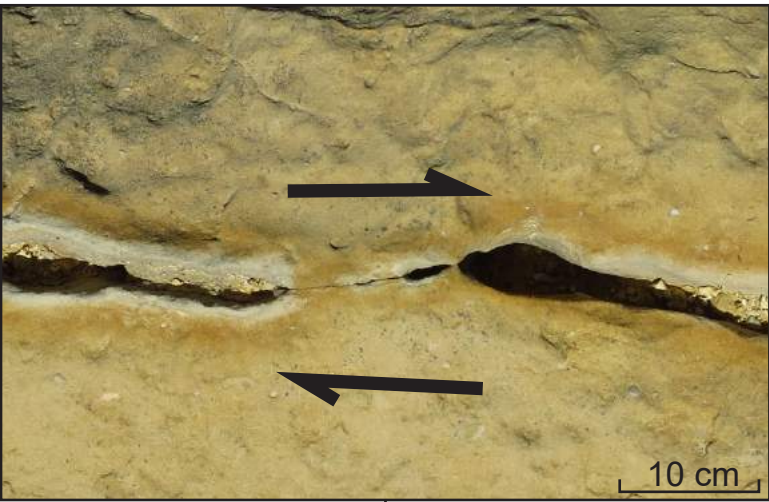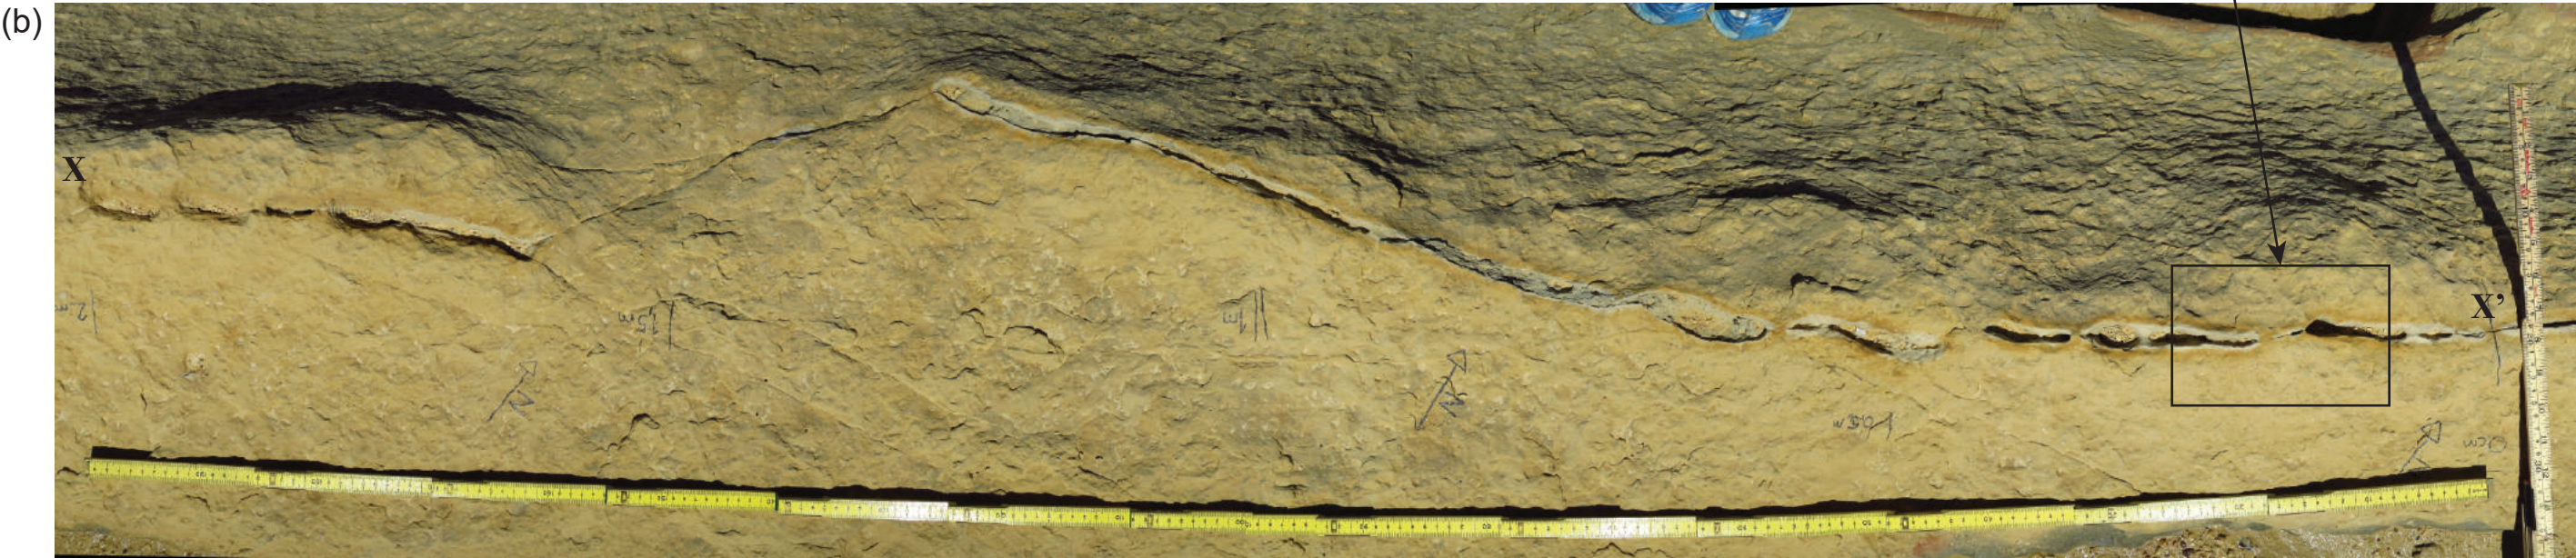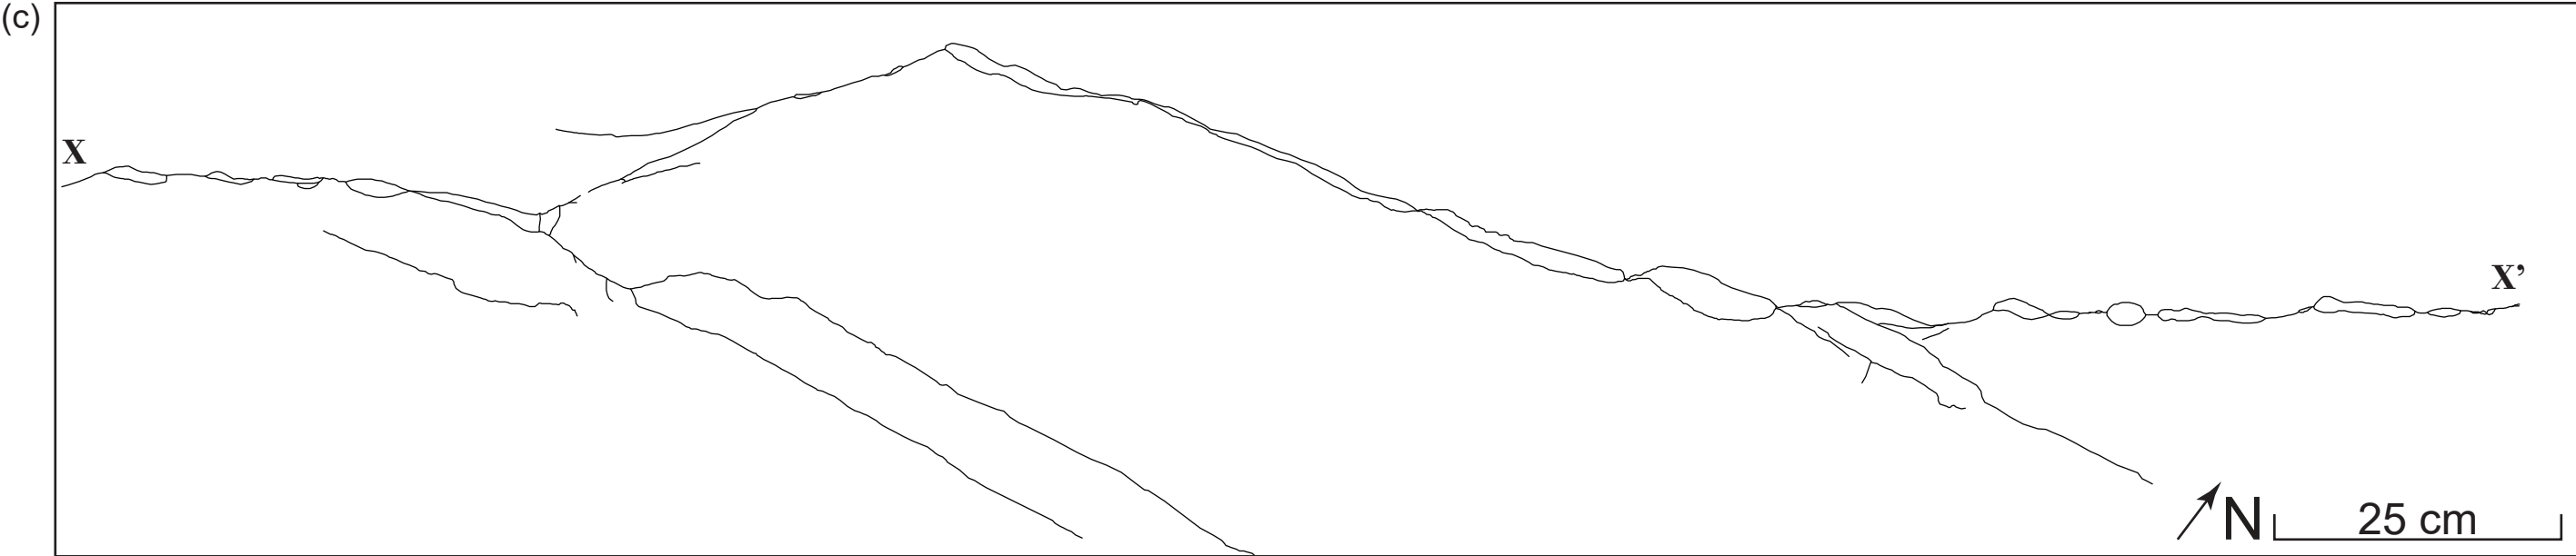

Supplement: f1 [file 3506743.f1.pdf]
